# Supplementary material for: Codon usage biases co-evolve with transcription termination machinery to suppress premature cleavage and polyadenylation
Source: eLife journal article supplement (doi:10.7554/elife.33569), 2018-03-16
Supplement: supp [file elife_poa_e33569_Figure_1_figure_supplement1.pdf › elife_poa_e33569_Figure_1_figure_supplement1.pdf]

## Figure 1-figure supplement 1

|                    |                                                               |
|--------------------|---------------------------------------------------------------|
| <i>frq</i> -deopt2 | ATGGCGGATAGTGGGGATAAATCCCAGGGCATGCGACCACCACCTTTGATAGTCGAGGG   |
| <i>wt-frq</i>      | ATGGCGGATAGTGGGGATAAATCCCAGGGCATGCGCCACCACCCTTTGACAGCCGTGGT   |
| <i>frq</i> -deopt1 | ATGGCGGATAGTGGGGATAAATCCCAGGGCATGCGGCCACCACCTTTTGATAGTCGTGGT  |
| <i>frq</i> -deopt2 | CATCCACTACCACGACGAGCAAGTCCAGATAAAAGTATAACATTAGAAAATCACCGCCTT  |
| <i>wt-frq</i>      | CACCTCTTCCCCGACGTGCTTCCCCAGACAAATCAATAACACTTGAAAATCACCGCCTT   |
| <i>frq</i> -deopt1 | CATCCTCTCCTCGACGTGCTAGTCCAGATAAATCAATAACACTTGAAAATCACCGCCTT   |
| <i>frq</i> -deopt2 | GCGCGAGATACTAGCAGCAGAGTTACAAGTAGTAGTGCAATAGGGGTAAAGAAAGTCAA   |
| <i>wt-frq</i>      | GCGCGAGATACTAGCAGCAGAGTTACTTCATCTCCGCACTGGGAGTGACCGAATCCCAA   |
| <i>frq</i> -deopt1 | GCGCGAGATACTAGCAGCAGAGTTACTTCATCTAGTGCACTGGGAGTGACTGAAAGTCAA  |
| <i>frq</i> -deopt2 | CCACAATTAAAAGTAGTCCAAACGACGAAATAGTAGTGGGAAAGTGAACCAACAAT      |
| <i>wt-frq</i>      | CCCCAACTCAAGAGCTCGCCACCCGAAGGAATTCGTCTGGAGAGAGCGAGCCACGAAT    |
| <i>frq</i> -deopt1 | CCTCAATTAAAAGTTCGCCTACTCGAAGGAATTCGTCTGGAGAAAGTGAACCTACGAAT   |
| <i>frq</i> -deopt2 | TGGTTTAATCAAAGTAATCGAAATCCAGCAGCAGCATTTTCATGATGAAAGTCATATAATG |
| <i>wt-frq</i>      | TGGTTTAATCAATCCAATCGTAACCCTGCCGCGGCCTTTTCATGACGAGAGCCATATCATG |
| <i>frq</i> -deopt1 | TGGTTTAATCAAAGTAATCGTAATCCTGCGCGGCCTTTTCATGATGAAAGTCATATAATG  |
| <i>frq</i> -deopt2 | GAAGTAGATCCACCATTTTATCAAAAAGAAACAGATAGTAGTAATGAAGAAAGTCGATAT  |
| <i>wt-frq</i>      | GAAGTCGATCCTCCTTTTATCAAAAAGGAGACTGACTCCTCCAACGAGGAATCCAGGTAT  |
| <i>frq</i> -deopt1 | GAAGTCGATCCTCCTTTTATCAAAAAGAACTGATAGTAGTAATGAAGAAAGTAGGTAT    |
| <i>frq</i> -deopt2 | CCACCAGGCGGAAATCCAGTACATCCACCAGGGGGGTACAATTACCAGGGTTTCGACCA   |
| <i>wt-frq</i>      | CCGCTGGACGAAACCCTGTACATCCGCCGGTGGTGTCCAGTTACCCGGGTTCGCCCG     |
| <i>frq</i> -deopt1 | CCGCTGGACGAAATCCTGTACATCCGCTGGTGGTGTGCAATTACCTGGGTTTCGGCCG    |
| <i>frq</i> -deopt2 | GTAGCAGCAGATAGTAGTGAGCAGATGATTATCGAAGTGAATTGATGATTTAACAGTA    |
| <i>wt-frq</i>      | GTTGCTGCTCACAGCAGCGCCCGGATGACTACCGCAGTGTATTGACGACTTGACTGTC    |
| <i>frq</i> -deopt1 | GTTGCTGCTCATAGTAGTGCGCGGATGATTATCGAGTGTGATTGATGATTTGACTGTG    |
| <i>frq</i> -deopt2 | GAAAAATAACGGCTTAAGGAGGAAGTGAAGAGG                             |
| <i>wt-frq</i>      | GAAAAACAAGCGGCTTAAGGAGGAAGTGAAGAGG                            |
| <i>frq</i> -deopt1 | GAAAAATAACGGCTTAAGGAGGAAGTGAAGAGG                             |
