# Supplementary material for: Codon usage biases co-evolve with transcription termination machinery to suppress premature cleavage and polyadenylation
Source: eLife journal article supplement (doi:10.7554/elife.33569), 2018-03-16
Supplement: supp [file elife_poa_e33569_Figure_5_figure_supplement_1.pdf › elife_poa_e33569_Figure_5_figure_supplement_1.pdf]

Figure 5-figure supplement 1

A

|          |                                                              |
|----------|--------------------------------------------------------------|
| 9435-wt  | GCTGAGGGCAGCGAGCAACAAGATATTCAGCATAGCTCGGAACATCAAGAAGCAGAATAC |
| 9435-opt | GCTGAGGGCAGCGAGCAGCAGGACATCCAGCACAGCTCGGAGCACCAAGAGGCCGAGTAC |
|          | ↓                                                            |
| 9435-wt  | TCCGTTGAATCAAACCCTAATGACCTAGGTGATCACCCATCGCAAGATGGAAACACC    |
| 9435-opt | TCCGTCGAGTCCAACCCCAACGACCTCGGCGACCACCCATCGCAAGATGGAAACACC    |

B

|            |                                                                    |
|------------|--------------------------------------------------------------------|
| 2034-wt    | GCCAATTTCCAGGGTCAAGATACCACCACTTACGACATCGACATGCATAACTTCATTGTC       |
| 2034-deopt | GCCAATTTCCAGGGTCAAGATACATATACTACAGATATAGATATGCATAATTTCATAGTA       |
| 2034-wt    | AATAAAGAAATTCGACATCGCGTCGATATTCTACACTTGTCGCCTCCTTGTCAAGTATGG       |
| 2034-deopt | <u>AATAAAGAAAT</u> ACGACATCGTGTGATATTCTCATTTATCTCCTCCTTGTCAAGTATGG |
