# Supplementary figures and images for: Codon usage biases co-evolve with transcription termination machinery to suppress premature cleavage and polyadenylation
Source: eLife journal article supplement (doi:10.7554/elife.33569), 2018-03-16

**Figure 2-figure supplement 1**

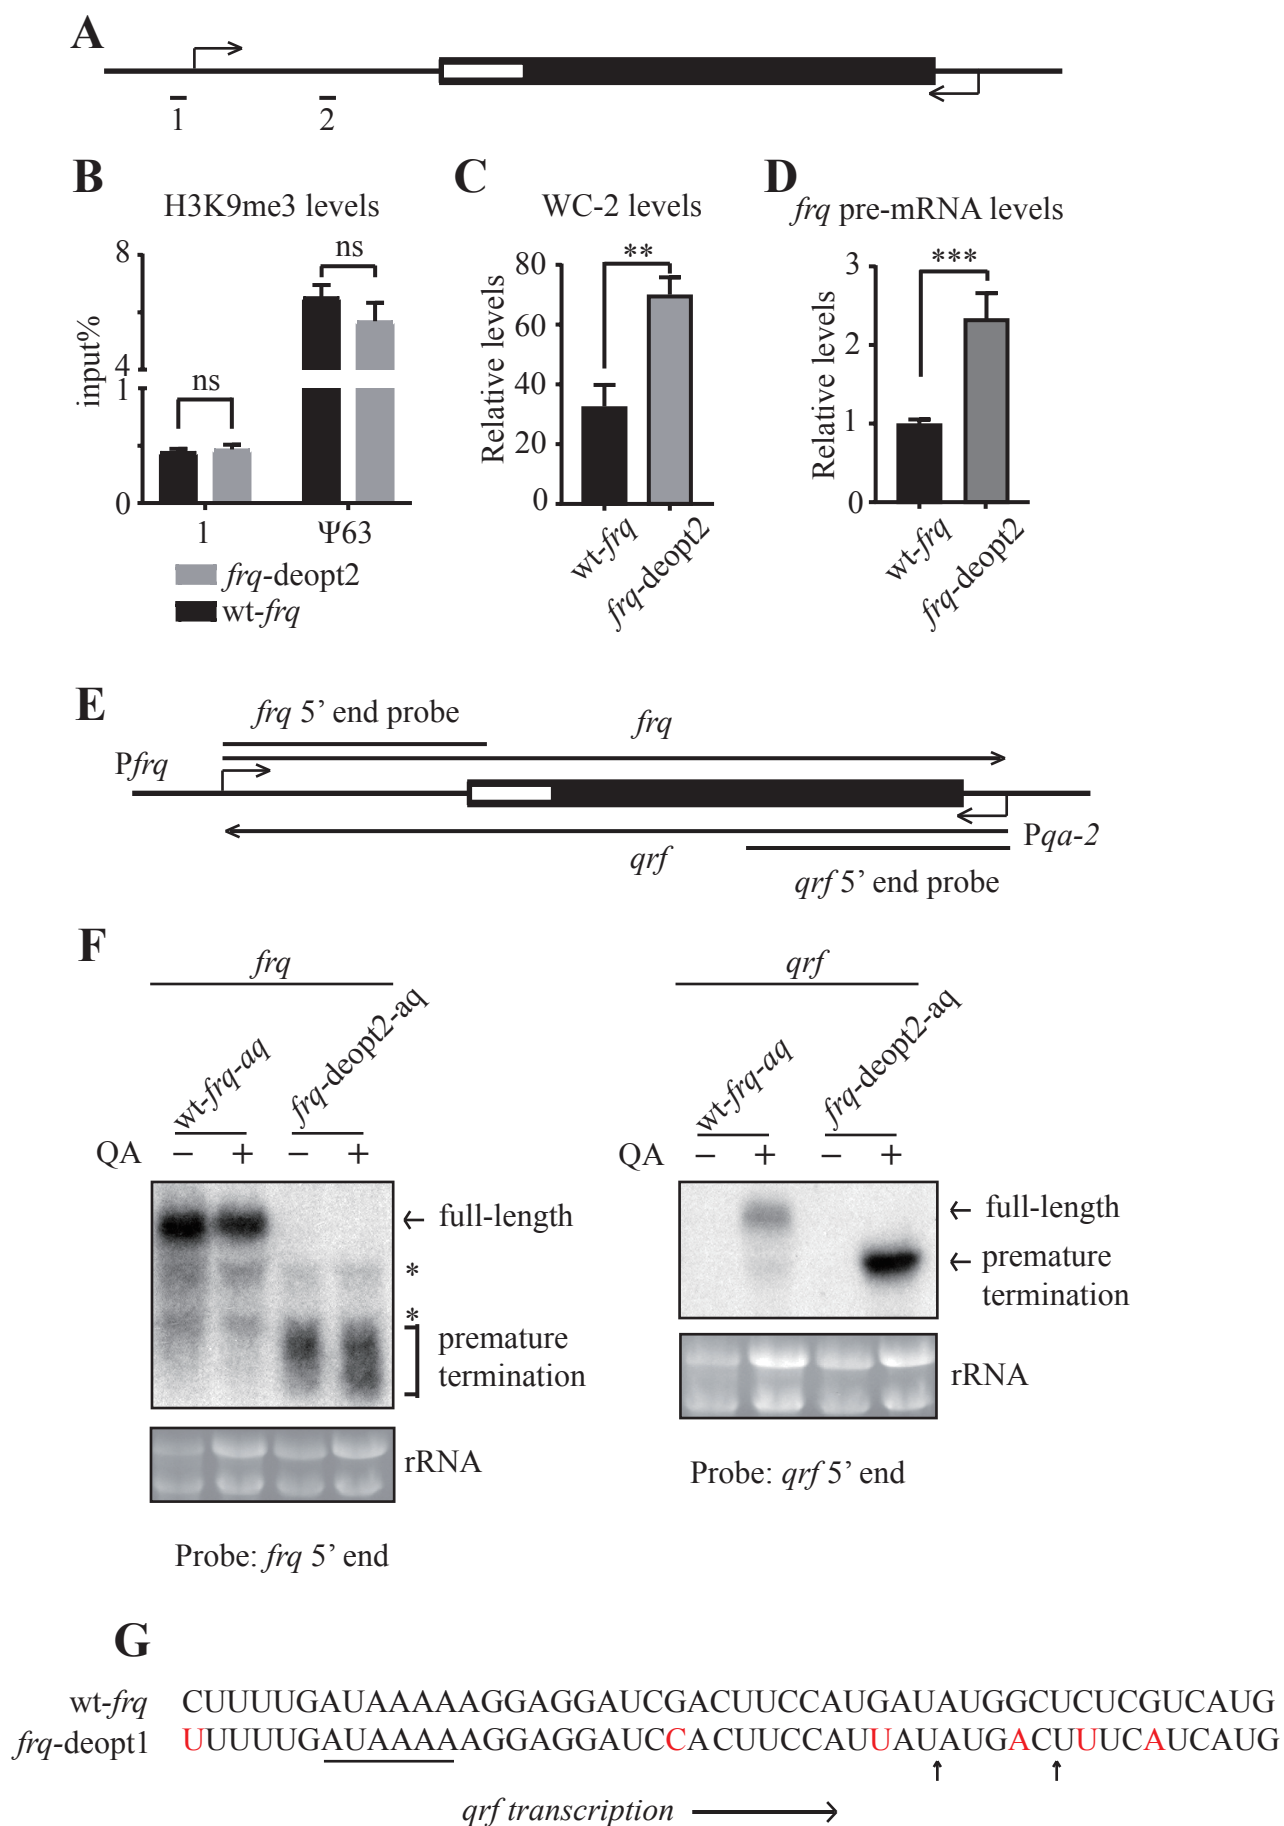

Supplement: supp [file elife_poa_e33569_Figure_2_figure_supplement_1.pdf › elife_poa_e33569_Figure_2_figure_supplement_1.pdf]

**Figure 3-figure supplement 1**

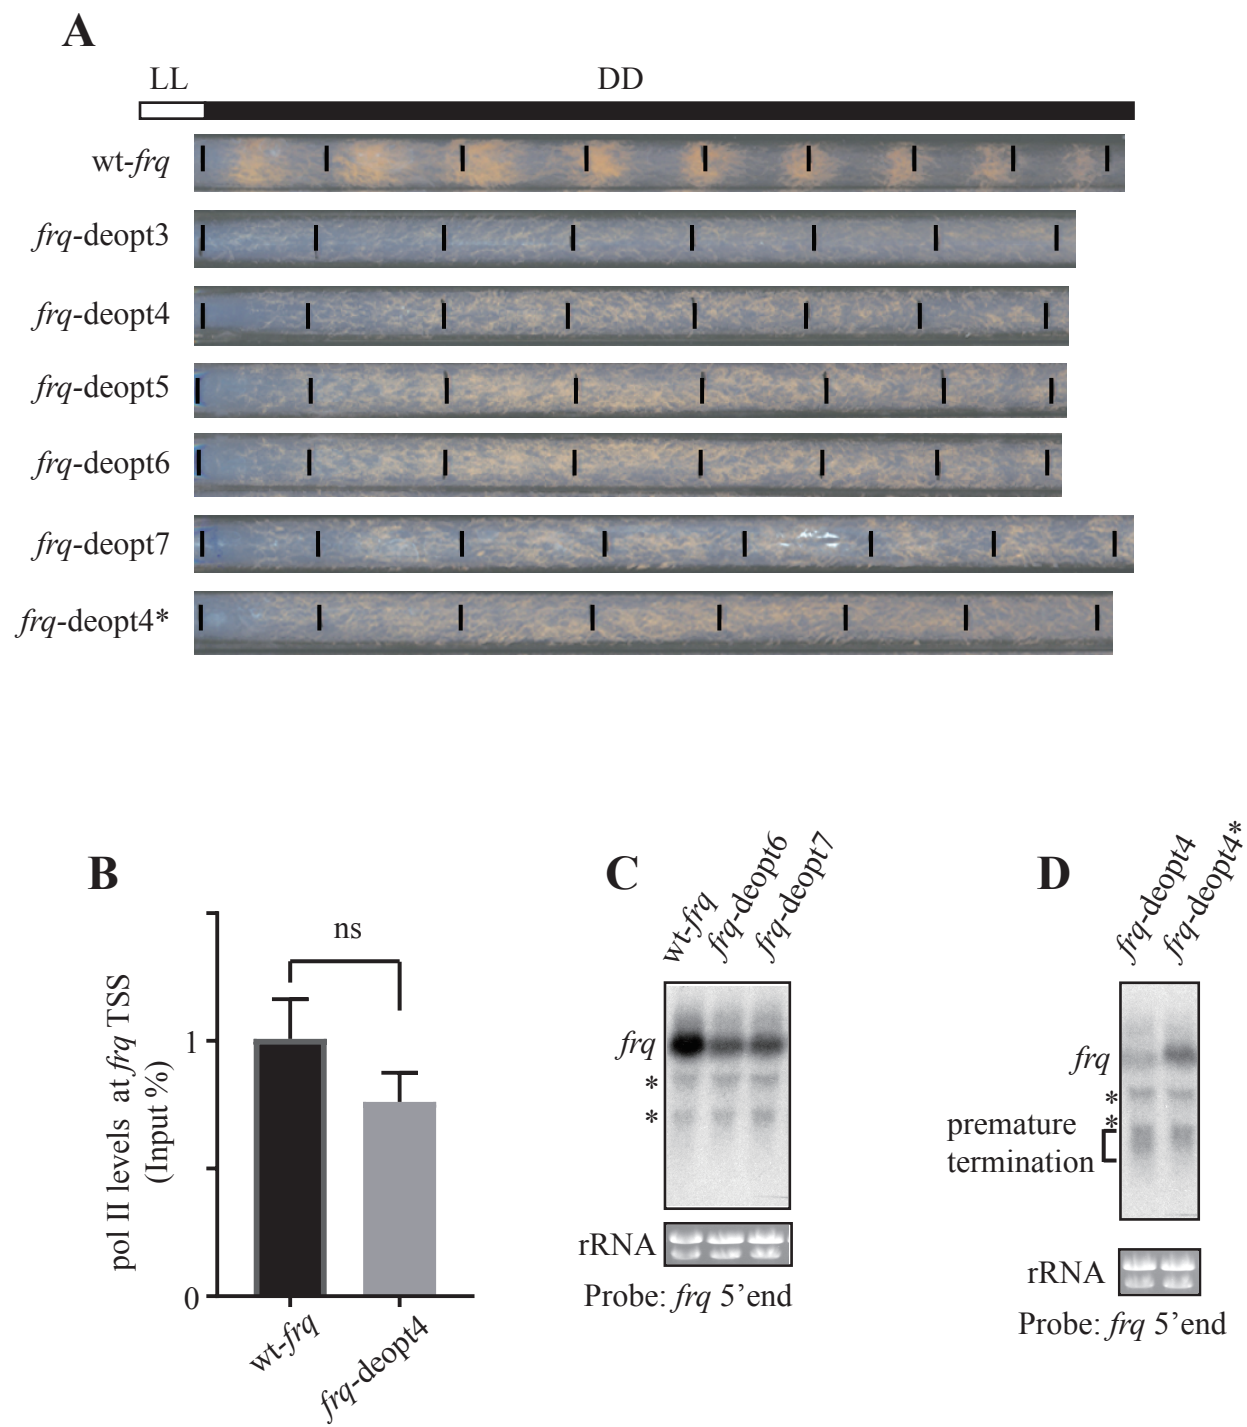

Supplement: supp [file elife_poa_e33569_Figure_3_figure_supplement_1.pdf › elife_poa_e33569_Figure_3_figure_supplement_1.pdf]

Figure 4-figure supplement 1

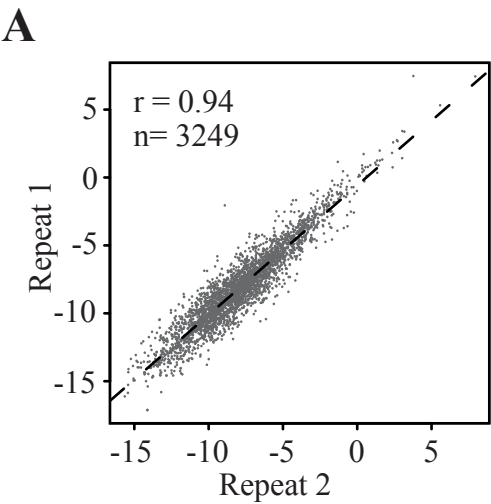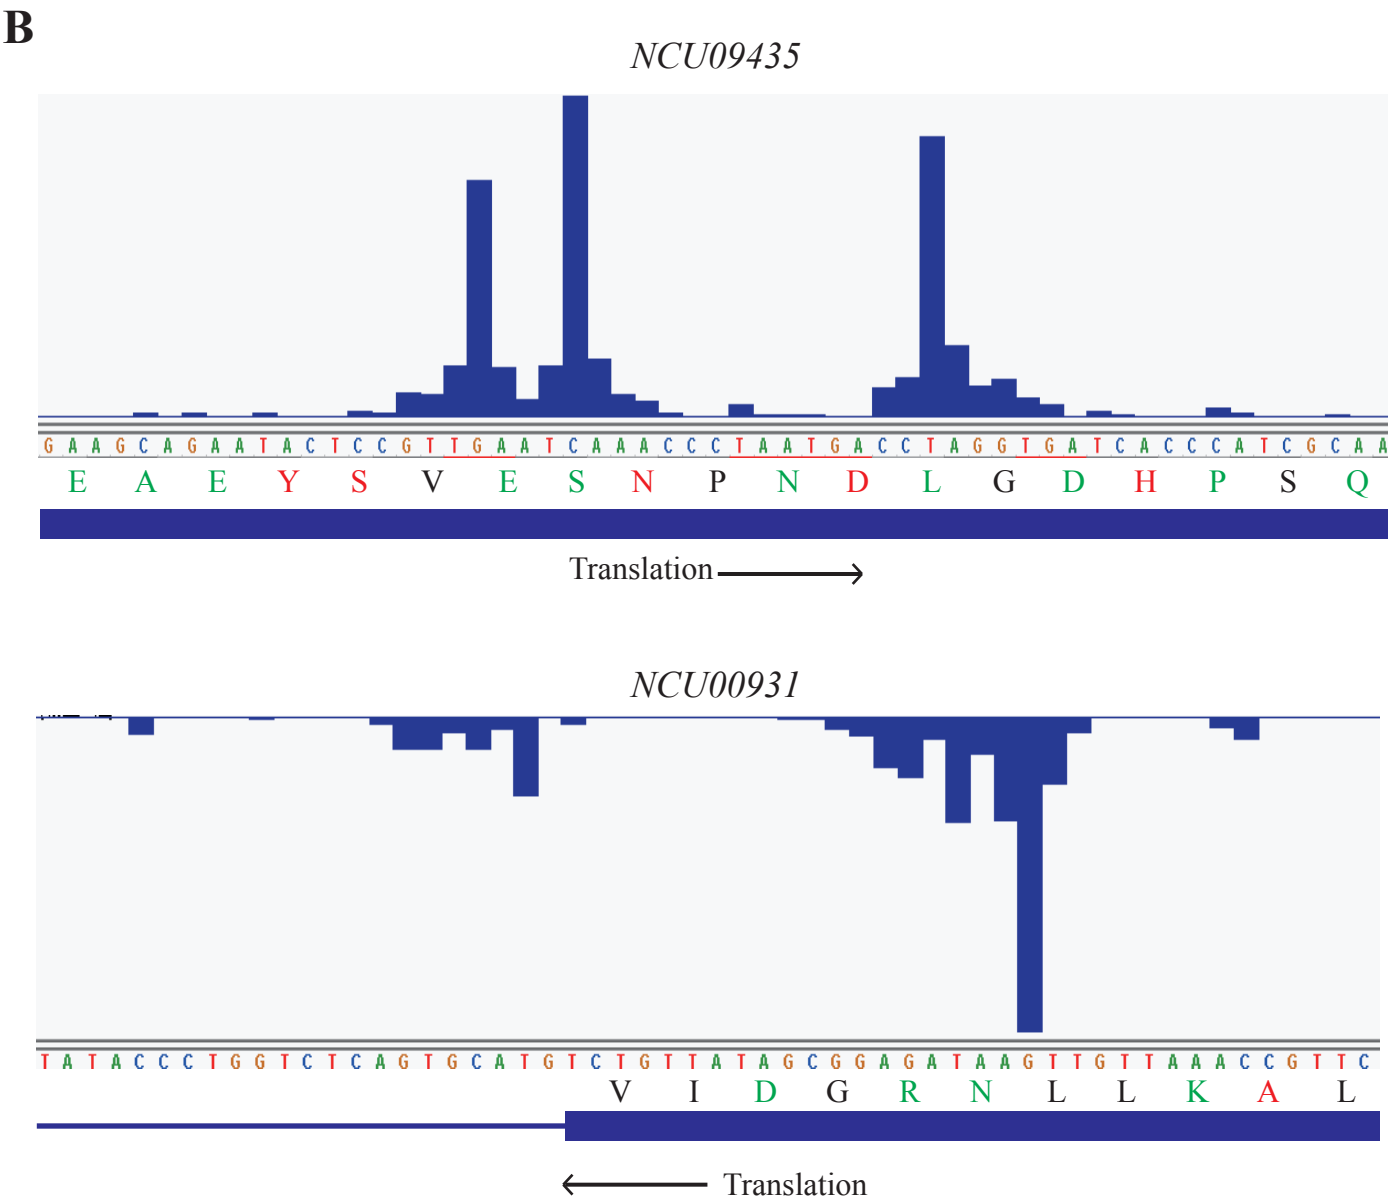

Supplement: supp [file elife_poa_e33569_Figure_4_figure_supplement_1.pdf › elife_poa_e33569_Figure_4_figure_supplement_1.pdf]

**Figure 5-figure supplement 2**

*N. crassa*

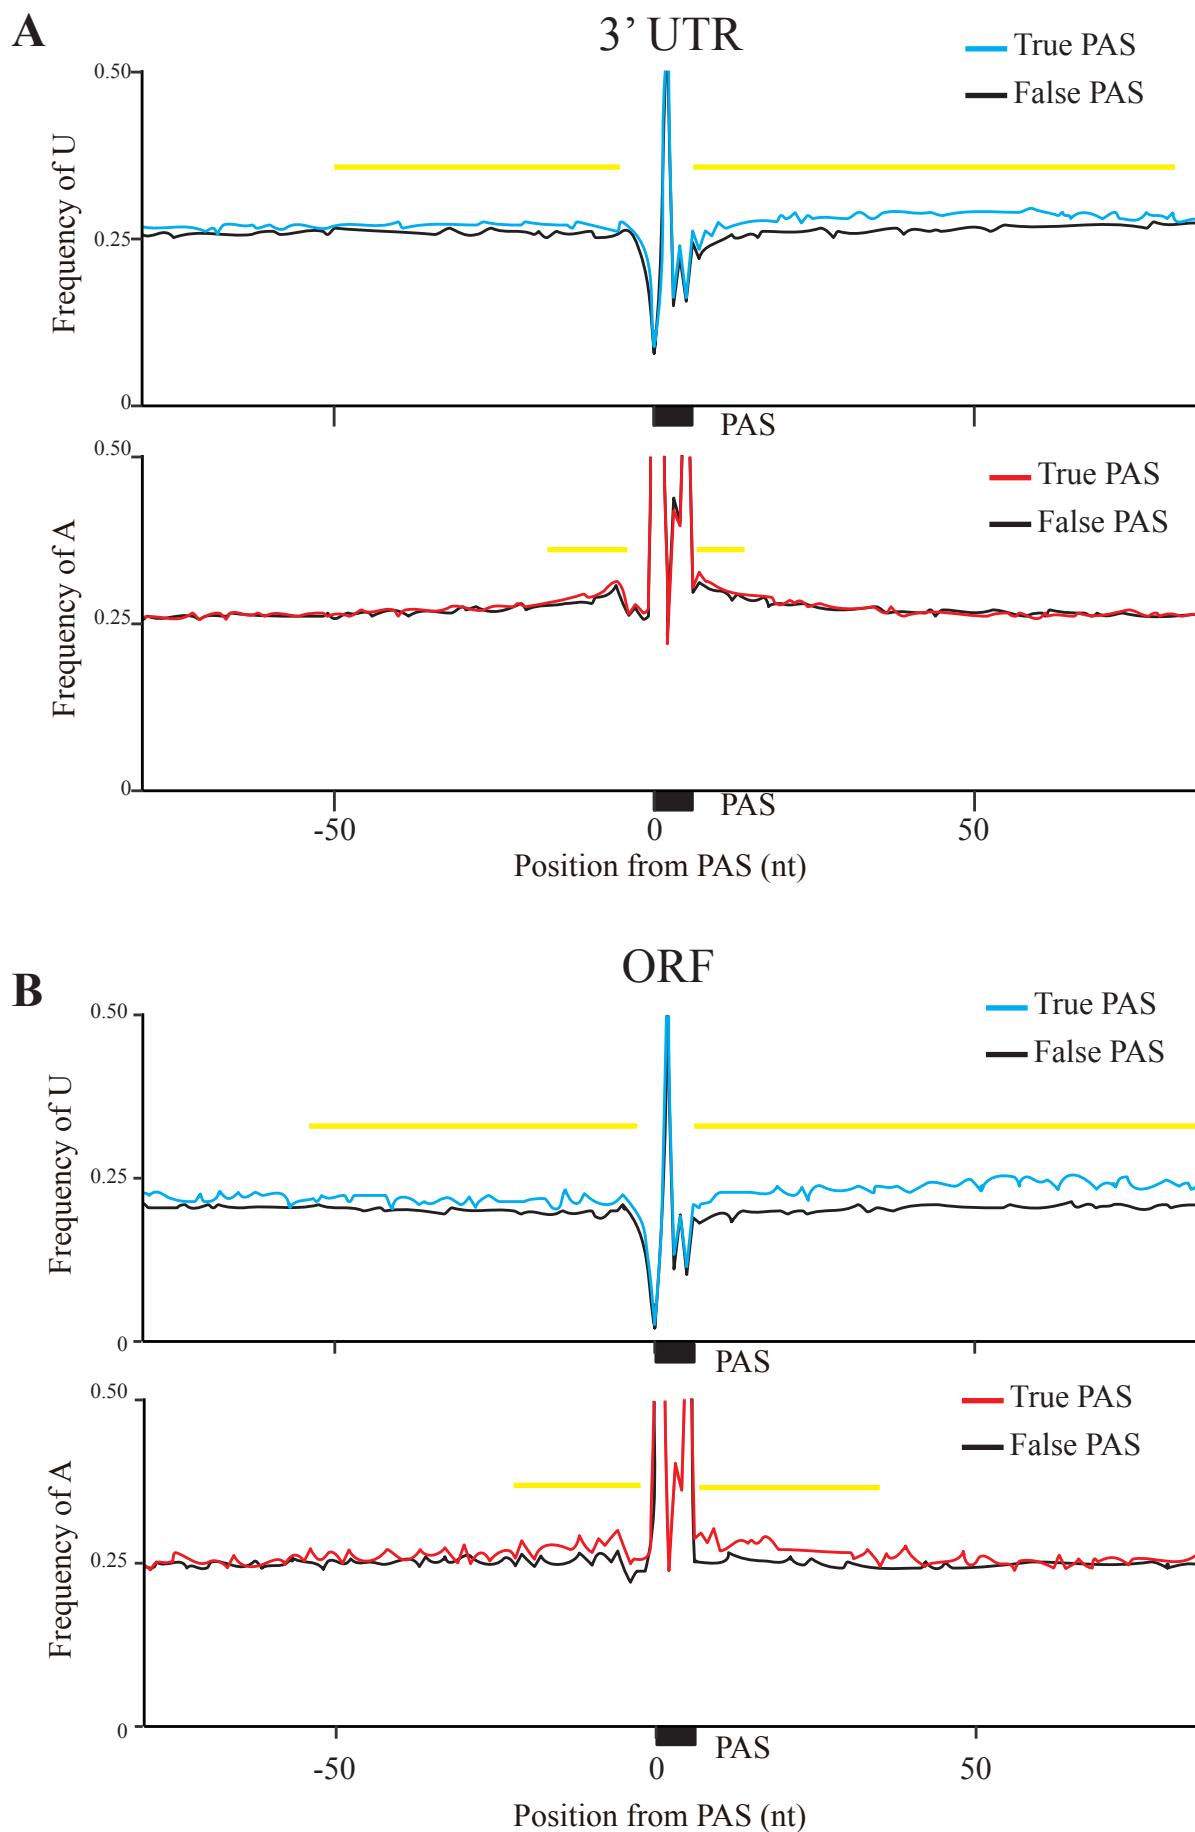

Supplement: supp [file elife_poa_e33569_Figure_5_figure_supplement_2.pdf › elife_poa_e33569_Figure_5_figure_supplement_2.pdf]

Figure 5-figure supplement 3

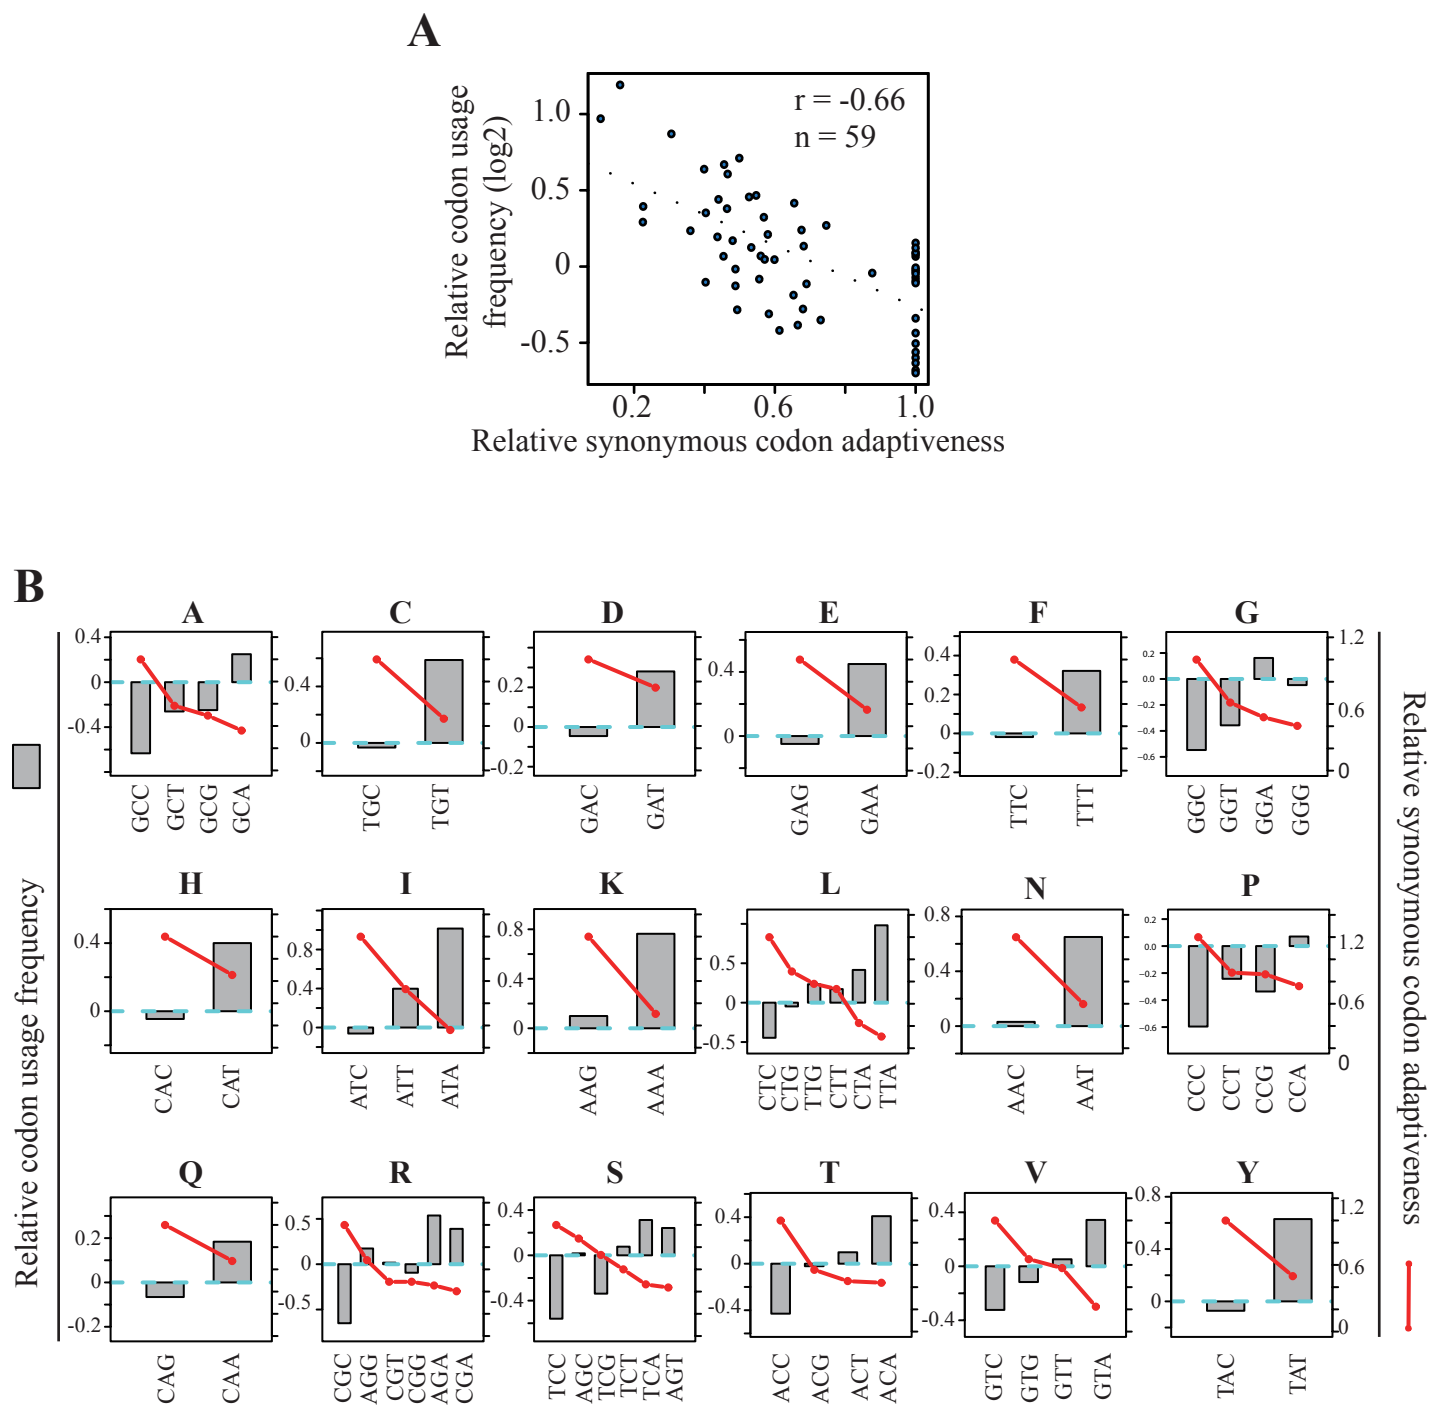

Supplement: supp [file elife_poa_e33569_Figure_5_figure_supplement_3.pdf › elife_poa_e33569_Figure_5_figure_supplement_3.pdf]

Figure 7-figure supplement 1

*M. musculus* C2C12 cell

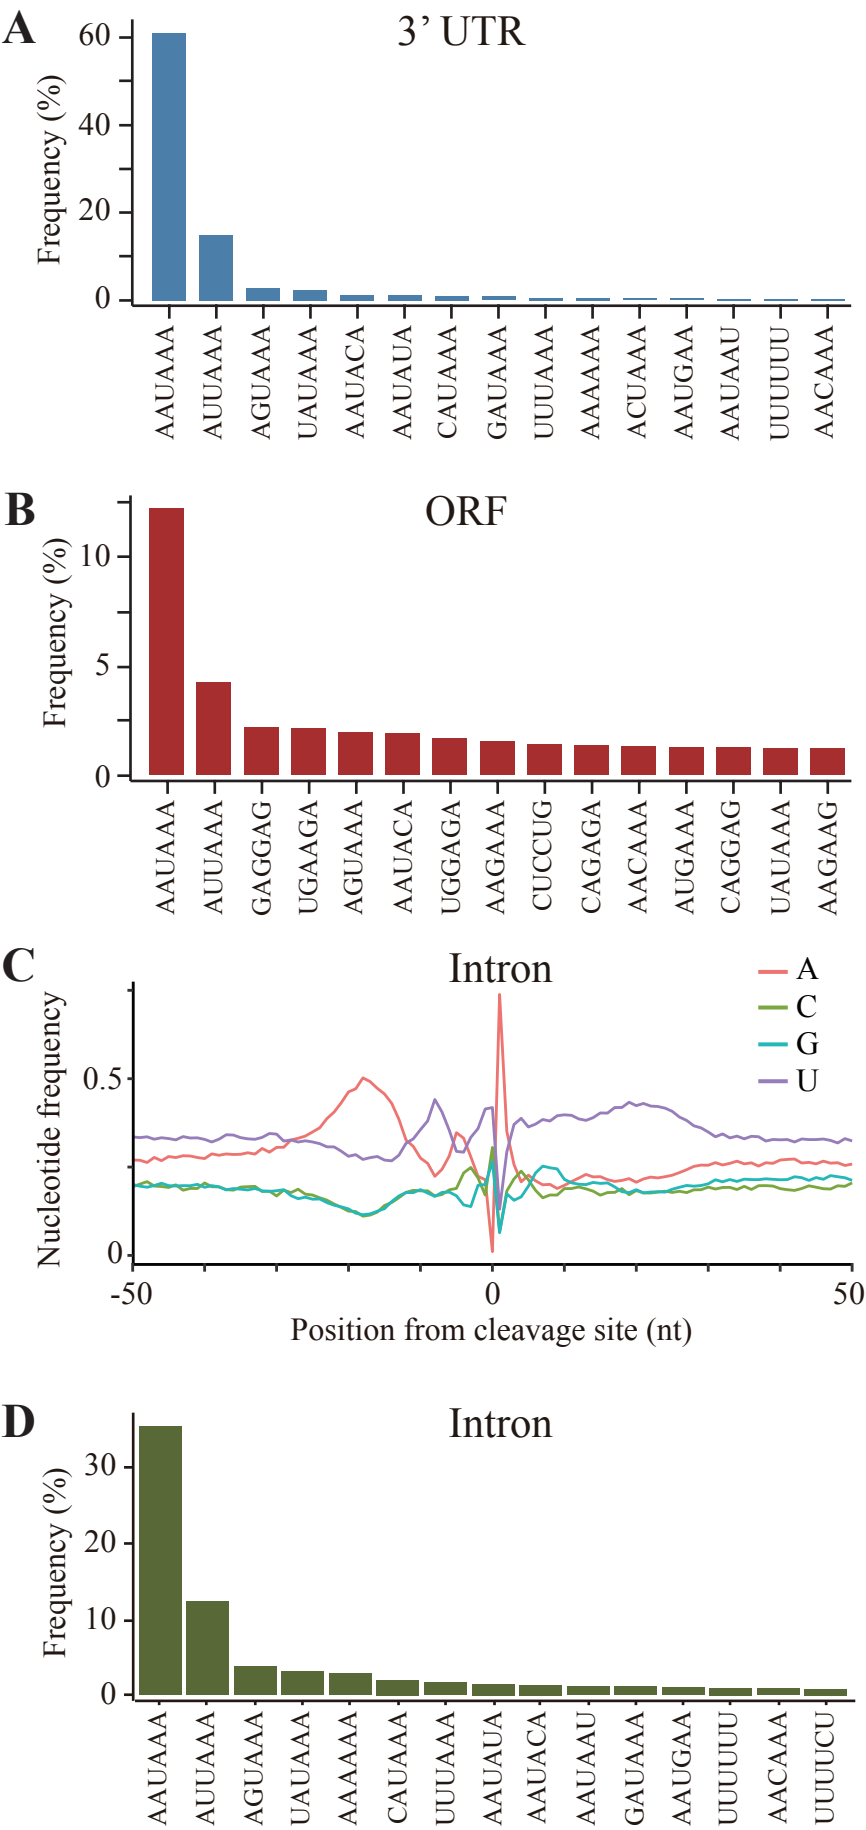

Supplement: supp [file elife_poa_e33569_Figure_7_figure_supplement_1.pdf › elife_poa_e33569_Figure_7_figure_supplement_1.pdf]

**Figure 7-figure supplement 2**  
*M. musculus* C2C12 cell

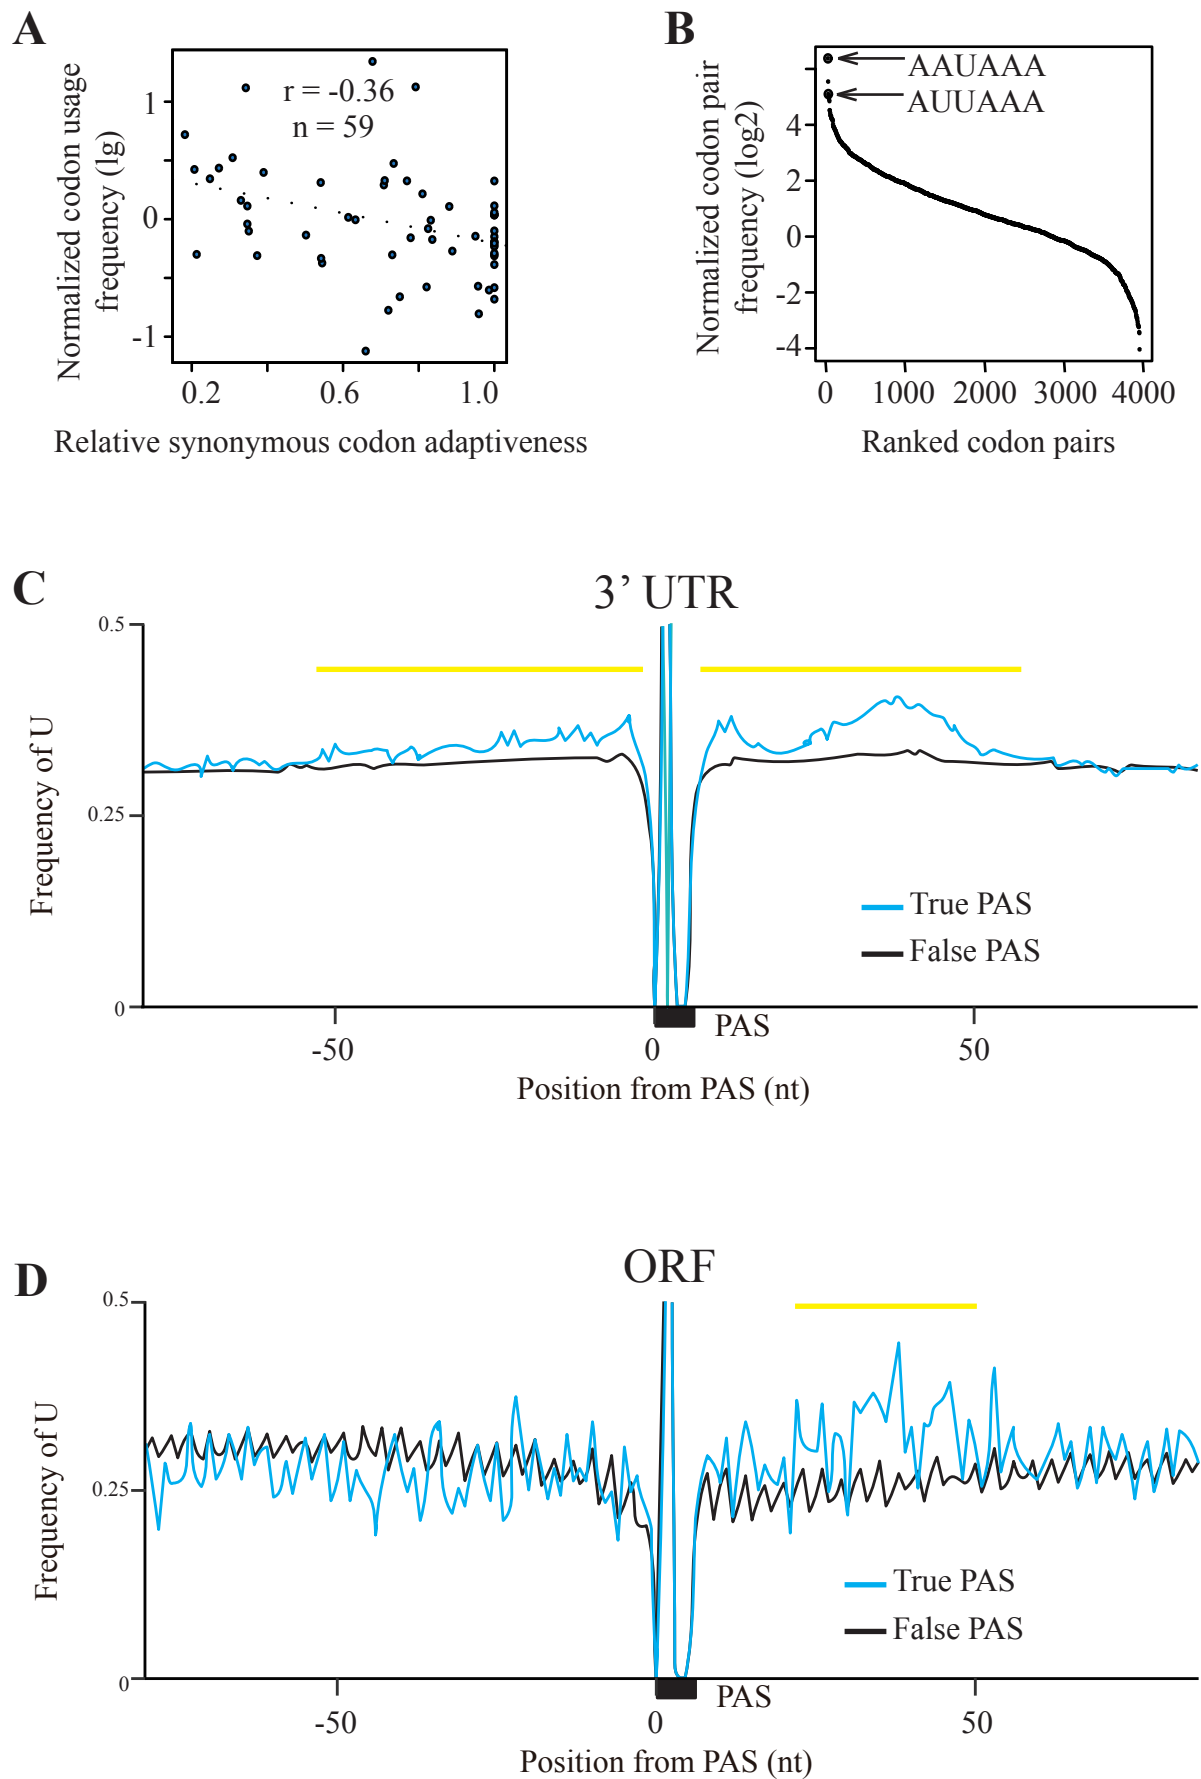

Supplement: supp [file elife_poa_e33569_Figure_7_figure_supplement_2.pdf › elife_poa_e33569_Figure_7_figure_supplement_2.pdf]
